# Supplementary material
Source: PubMed Central journal article supplement (PMC3746026)

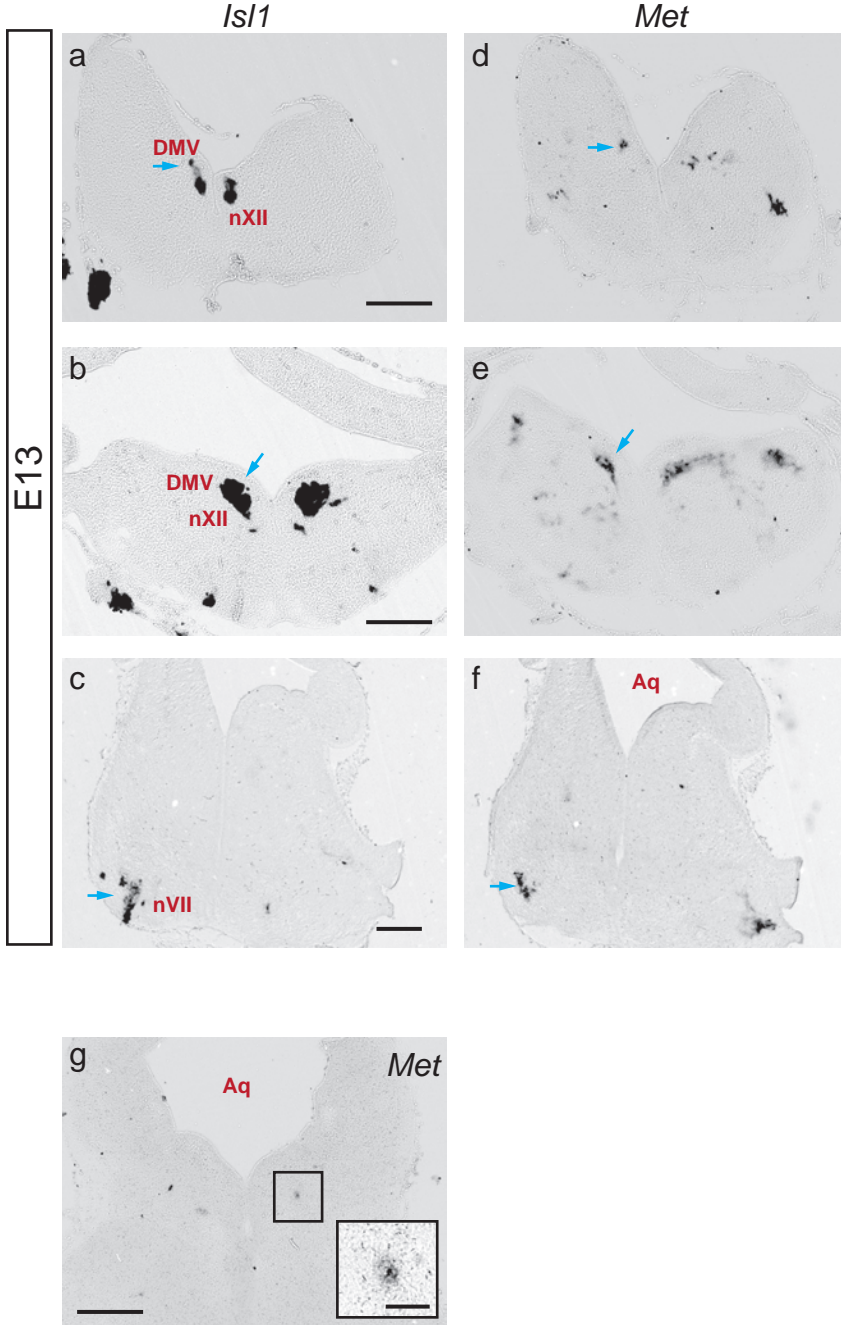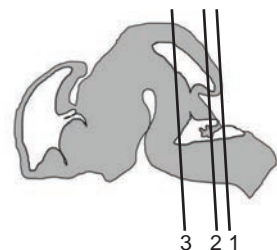

Suppl Figure 1

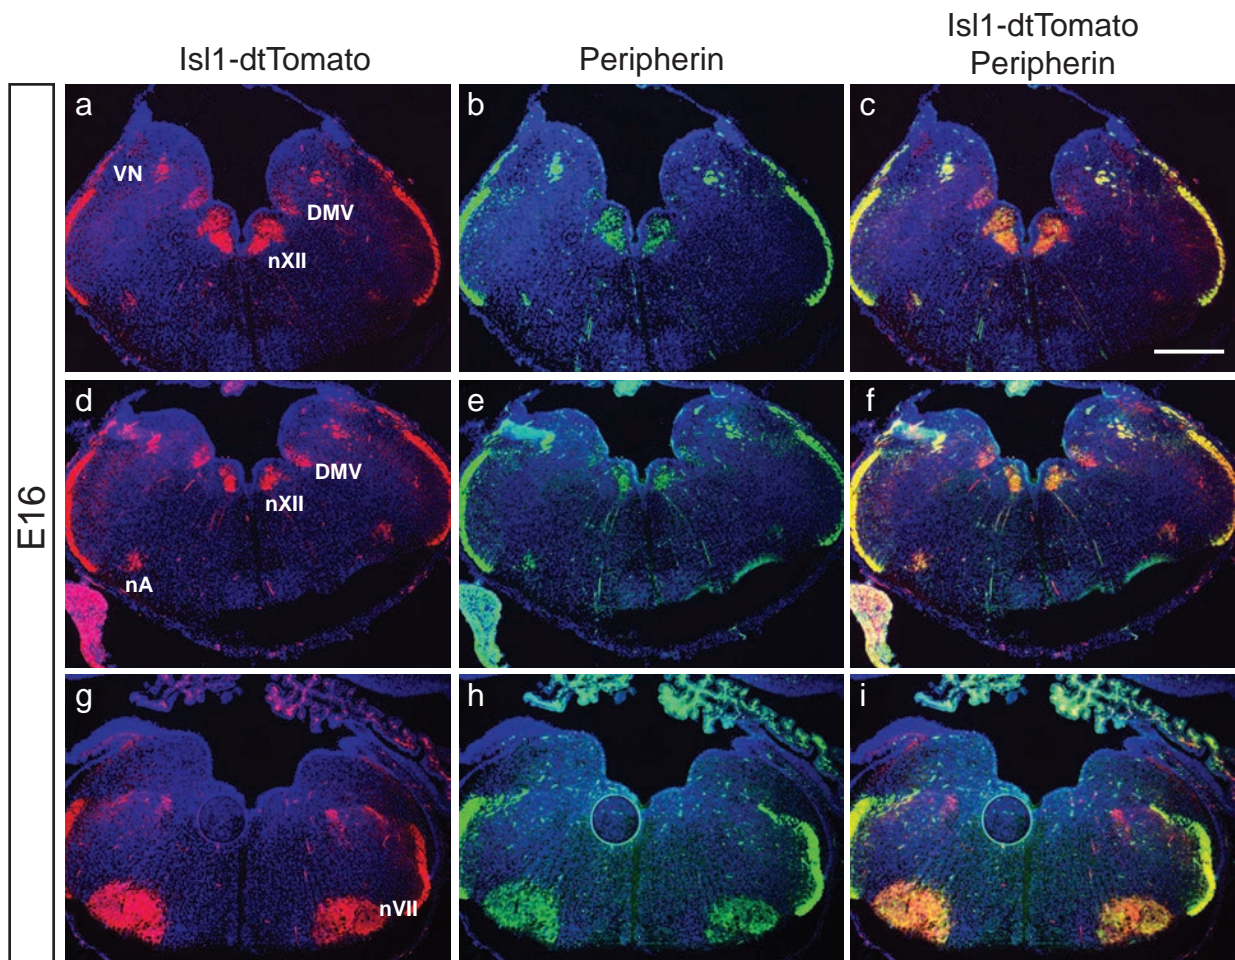

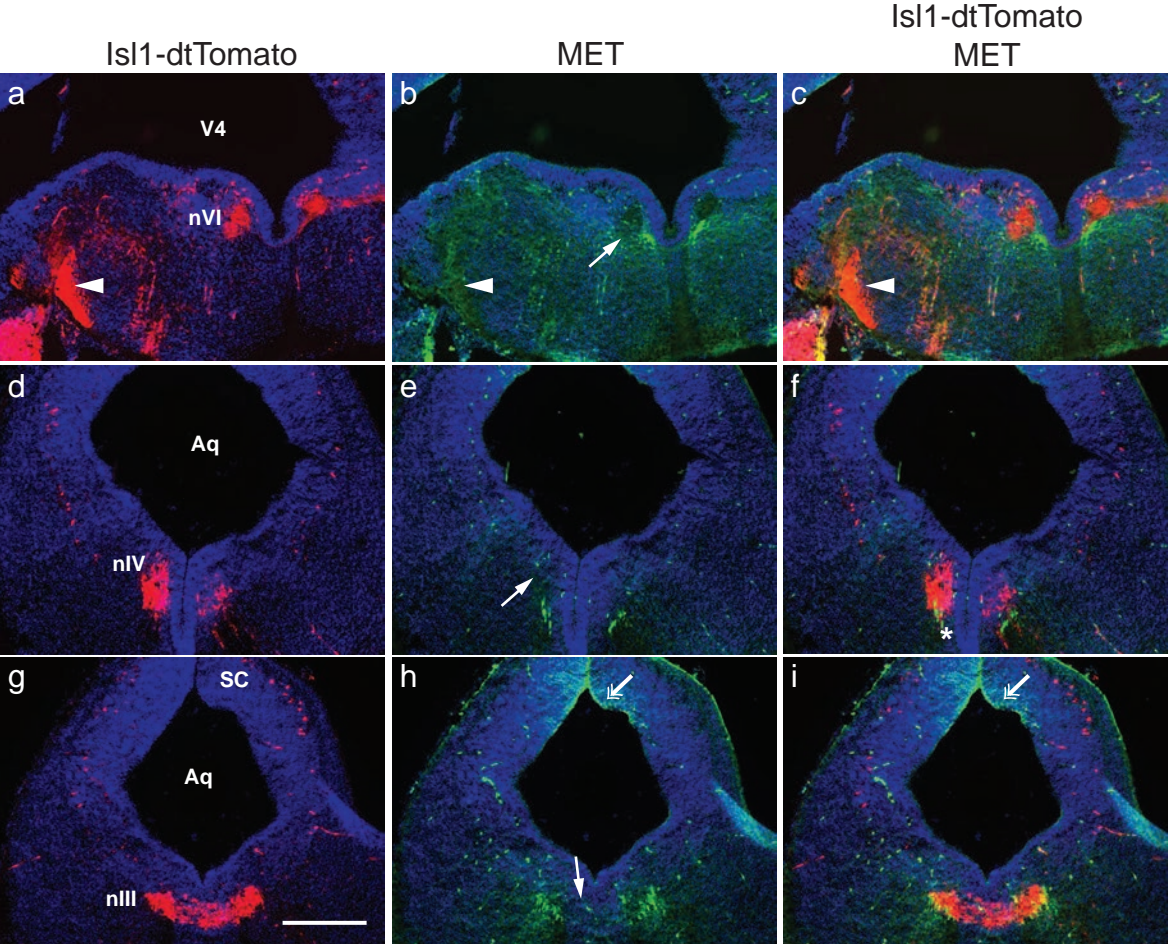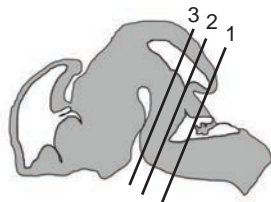

a

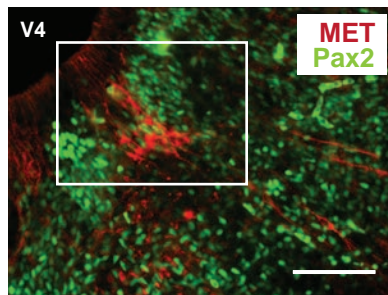

b

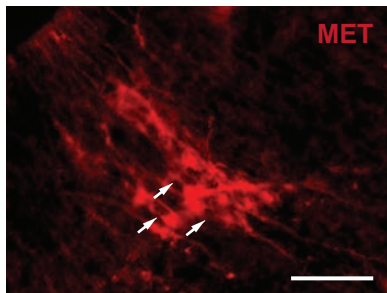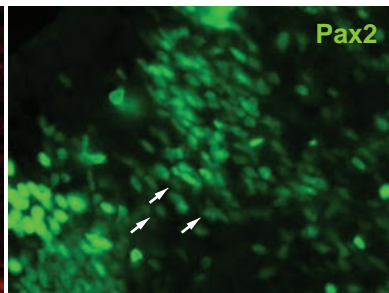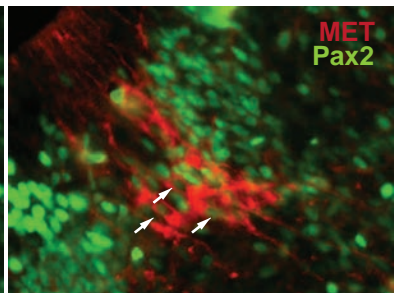

a

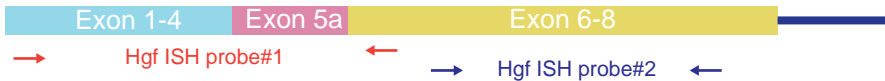

b

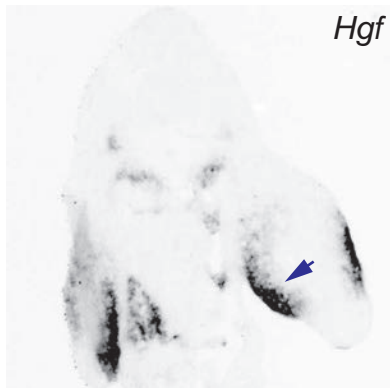

Supplement: NIHMS497068-supplement-01.pdf [file NIHMS497068-supplement-01.pdf]
